# Supplementary material for: Stakeholders’ Perspectives on the Application of New Diagnostic Devices for Urinary Schistosomiasis in Oyo State, Nigeria: A Q-Methodology Approach
Source: Glob Health Sci Pract. 2022 Aug 30;10(4):e2100780. doi: 10.9745/GHSP-D-21-00780 (PMC9426976; doi:10.9745/GHSP-D-21-00780)
Supplement: GHSP-D-21-00780-supplement-3.xlsx [file GHSP-D-21-00780-supplement-3.xlsx]

## Sheet: Quetions
Statement		Scale
		Not at all	Somewhat	Mostly	Completely
Statement	The statement is clear and unambiguous as would be read by the participants.	1	2	3	4
	The statement illustrates heterogeneity (depth and breadth) in answering the research and sub-research questions.	1	2	3	4
Open Question	is proper cleaning of the device included in "maintenance" of the device (new parts)? daily use will include cleaning the device (I assume) but also general safe practices when handling samples (perhaps you only focus on the purpose and not carrying out the diagnoosis from sample preparation - which is also ok).
	The device should be easy to clean and disinfect to prevent re-contamination. The role of the village/community head is important in the acceptance of the new diagnostic device

## Sheet: Final Statements
Item	Q statement	Section
Item 1	Microscopy using a concentration technique is the recommended method to prove active schistosomiasis, despite its low sensitivity and need for expert users.
Item 2	Diagnosis should include the identification of Schistosoma parasites in both humans and water sources that may be contaminated.
Item 3	Mass screening and diagnosis should be carried out alongside mass drug administration with praziquantel.
Item 4	Schistosomiasis surveillance enables programme managers to monitor the effectiveness of intervention strategies and identify which populations require continuing interventions.
Item 5	The availability of Rapid Diagnostic Test (RDTs), which requires only minimal infrastructure, would improve diagnosis and surveillance simultaneously.
Item 6	Implementing an affordable and simple point-of-care (POC) diagnostics solution will reduce the financial burden of equipment and personnel at each health facility.
Item 7	Point-of-care diagnostics that can detect and confirm cases immediately will reduce the risk of missed or misdiagnosed cases.
Item 8	The quantification of egg excretion helps to assess the transmission potential of populations living in endemic areas.
Item 9	Schistosomiasis control programs should target school-aged children only.
Item 10	Due to the low level of education and lack of training among community health workers, incorrect treatment is often prescribed.
Item 11	Presenting data on the severity of schistosomiasis infection of specific locations will guide the development of strategies for effective case management and control elimination.
Item 12	Passive case detection, based on people’s self-reporting, has been considered a less expensive strategy for the control of schistosomiasis.
Item 13	Prevalence and intensity of infection is often higher among children than among adults.
Item 14	Schistosomiasis diagnosis should be done closest to the community as it reduces the time to carry samples back to the laboratory.
Item 15	Diagnostic and treatment campaigns should target school-age children, adolescents and those whose occupations involve contact with infectious water (e.g fishing, farming, irrigation, and domestic tasks in water).
Item 16	Simple, rapid point-of-care (POC) tests should be used in primary health care settings where patients often travel long distances to access healthcare facilities.
Item 17	Diagnostic devices should be deployed in primary health care centres, clinics and health posts since they are the most lacking in equipment.
Item 18	Testing of urine samples for schistosomiasis with school-based surveys should be done at the school location.
Item 19	It is convenient to treat patients for schistosomiasis infection without a confirmed diagnosis due to the delay in receiving test results from referral hospitals.
Item 20	Schistosomiasis elimination calls for developing novel diagnostic tools with higher sensitivity and specificity than microscopes.
Item 21	Diagnostic device for schistosomiasis with minimal to no sample preparation is ideal.
Item 22	The diagnostic device should quantify eggs to provide an estimation of the number of people that have been exposed to schistosomiasis in a population.
Item 23	Devices should be easy to use by medical personnel and health workers such as Community Health Extension Workers (CHEWS), Community Health Officers (CHO), Laboratory scientists to detect and diagnose schistosomiasis infected patients.
Item 24	Patient samples should be processed in batches to get a faster turnaround time and increase the efficiency of sample processing during mass campaigns or sensitization meetings.
Item 25	Ideal diagnostic approaches should allow the concurrent detection of several pathogens in different biological samples such as urine, blood and stool.
Item 26	Diagnostic devices should be sensitive enough for detecting very light schistosomiasis infections.
Item 27	Diagnostic devices should have their own reliable power sources due to the unstable power connectivity in rural and distant communities.
Item 28	The best diagnostic devices should be easy to transport safely in cars, on motorbikes, and bicycles to remote locations.
Item 29	Diagnostic devices should be compact and portable so that it can be easily deployed in the community.
Item 30	Diagnostic devices/tests should identify and map out areas with a large spread of schistosomiasis and be able to trace the source of the disease.
Item 31	Devices should be locally repaired and maintained by local technicians in case of breakdown.
Item 32	The device should be easy to clean and disinfect to prevent re-contamination.
Item 33	The cost per diagnostic test should be free (covered by the Government).
Item 34	Cost per diagnostic test should be less than 1000 Naira (€2).
Item 35	Mass drug administration campaigns should be accompanied by mass diagnostic and disease awareness campaigns.
Item 36	Data from diagnostic devices should be accessible to stakeholders (local government, DSNO, MOH, Researchers and NGOs) to enhance planning.
Item 37	New interventions should consider training the health care workers at the community level and the informal sector (PMVs and traditional medicine) to increase coverage to diagnostics.
Item 38	Diagnostic tools for schistosomiasis should be deployed and used at the community level by PMVs and community mobilizers as they already serve as trusted stakeholders in the community.
Item 39	The role of the village/community head is important in the acceptance of the new diagnostic device.
Item 40	Patients with schistosomiasis should be tested before being treated.

## Sheet: Expert Ratings (ICVI&C-Alpha)
Item Description	Statement	Rater 1		Rater 2		Rater 3		Rater 4
1	Microscopy using a concentration technique is the recommended method to prove active schistosomiasis, despite its low sensitivity and need for expert users.	4	4	4	4	2	3	3	3
2	Diagnosis should include the identification of Schistosoma parasites in both humans and water sources that may be contaminated.	4	4	4	4	2	2	4	4
3	Mass screening and diagnosis should be carried out alongside mass drug administration with praziquantel.	4	4	4	4	3	3	4	4
4	Schistosomiasis surveillance enables programme managers to monitor the effectiveness of intervention strategies and identify which populations require continuing interventions.	4	4	4	4	3	3	4	4
5	The availability of Rapid Diagnostic Test (RDTs), which requires only minimal infrastructure, would improve diagnosis and surveillance simultaneously.	4	4	4	4	3	3	4	4
6	Implementing an affordable and simple point-of-care (POC) diagnostics solution will reduce the financial burden of equipment and personnel at each health facility.	4	4	3	3	3	3	4	4
7	Point-of-care diagnostics that can detect and confirm cases immediately will reduce the risk of missed or misdiagnosed cases.	4	4	3	3	2	3	4	3
8	The quantification of egg excretion helps to assess the transmission potential of populations living in endemic areas.	4	4	4	4	3	3	4	4
9	Schistosomiasis control programs should target school-aged children only.	4	4	4	4	3	3	4	3
10	Due to the low level of education and lack of training among community health workers, incorrect treatment is often prescribed.	4	4	4	4	3	3	4	4
11	Presenting data on the severity of schistosomiasis infection of specific locations will guide the development of strategies for effective case management and control elimination.	4	4	4	4	3	3	4	4
12	Passive case detection, based on people’s self-reporting, has been considered a less expensive strategy for the control of schistosomiasis.	4	4	4	4	3	3	4	4
13	Prevalence and intensity of infection is often higher among children than among adults.	4	4	4	4	3	3	4	4
14	Schistosomiasis diagnosis should be done closest to the community as it reduces the time to carry samples back to the laboratory.	4	4	4	4	3	3	4	4
15	Diagnostic and treatment campaigns should target school-age children, adolescents and those whose occupations involve contact with infectious water (e.g fishing, farming, irrigation, and domestic tasks in water).	4	4	4	4	3	3	4	4
16	Simple, rapid point-of-care (POC) tests should be used in primary health care settings where patients often travel long distances to access healthcare facilities.	3	4	4	4	3	3	4	4
17	Diagnostic devices should be deployed in primary health care centres, clinics and health posts since they are the most lacking in equipment.	4	4	4	4	3	3	4	4
18	Testing of urine samples for schistosomiasis with school-based surveys should be done at the school location.	4	4	4	4	3	3	4	4
19	It is convenient to treat patients for schistosomiasis infection without a confirmed diagnosis due to the delay in receiving test results from referral hospitals.	4	4	3	3	3	3	4	4
20	Schistosomiasis elimination calls for developing novel diagnostic tools with higher sensitivity and specificity than microscopes.	4	4	4	4	2	3	4	4
21	Diagnostic device for schistosomiasis with minimal to no sample preparation is ideal.	4	4	4	4	2	3	4	4
22	The diagnostic device should quantify eggs to provide an estimation of the number of people that have been exposed to schistosomiasis in a population.	4	4	4	4	3	3	4	4
23	Devices should be easy to use by medical personnel and health workers such as Community Health Extension Workers (CHEWS), Community Health Officers (CHO), Laboratory scientists to detect and diagnose schistosomiasis infected patients.	4	4	4	4	3	3	4	4
24	Patient samples should be processed in batches to get a faster turnaround time and increase the efficiency of sample processing during mass campaigns or sensitization meetings.	4	4	4	4	3	3	4	4
25	Ideal diagnostic approaches should allow the concurrent detection of several pathogens in different biological samples such as urine, blood and stool.	4	4	4	4	3	3	4	4
26	Diagnostic devices should be sensitive enough for detecting very light schistosomiasis infections.	4	4	3	3	2	3	4	4
27	Diagnostic devices should have their own reliable power sources due to the unstable power connectivity in rural and distant communities.	4	4	3	3	2	3	4	4
28	The best diagnostic devices should be easy to transport safely in cars, on motorbikes, and bicycles to remote locations.	4	4	4	4	2	3	4	4
29	Diagnostic devices should be compact and portable so that it can be easily deployed in the community.	4	4	4	4	3	3	4	4
30	Diagnostic devices/tests should identify and map out areas with a large spread of schistosomiasis and be able to trace the source of the disease.	4	4	4	4	3	3	4	4
31	Devices should be locally repaired and maintained by local technicians in case of breakdown.	4	4	4	4	3	3	4	4
32	The device should be easy to clean and disinfect to prevent re-contamination.	4	4	4	4	3	3	4	4
33	The cost per diagnostic test should be free (covered by the Government).	4	4	4	4	3	3	4	4
34	Cost per diagnostic test should be less than 1000 Naira (€2).	4	4	4	4	3	3	4	4
35	Mass drug administration campaigns should be accompanied by mass diagnostic and disease awareness campaigns.	4	4	4	4	3	3	4	4
36	Data from diagnostic devices should be accessible to stakeholders (local government, DSNO, MOH, Researchers and NGOs) to enhance planning.	4	4	3	3	3	3	4	4
37	New interventions should consider training the health care workers at the community level and the informal sector (PMVs and traditional medicine) to increase coverage to diagnostics.	4	4	4	4	3	3	4	4
38	Diagnostic tools for schistosomiasis should be deployed and used at the community level by PMVs and community mobilizers as they already serve as trusted stakeholders in the community.	4	4	4	4	3	3	4	4
39	The role of the village/community head is important in the acceptance of the new diagnostic device.	4	4	4	4	3	3	4	4
40	Patients with schistosomiasis should be tested before being treated.	4	4	4	4	3	3	4	3

## Sheet: ICVI  Final
Item Description	Statement	Rater 1		Rater 2		Rater 3		Rater 4		Number of Agree	I-CVI
1	Microscopy using a concentration technique is the recommended method to prove active schistosomiasis, despite its low sensitivity and need for expert users.	4	4	4	4	2	3	3	3	7	0.875
2	Diagnosis should include the identification of Schistosoma parasites in both humans and water sources that may be contaminated.	4	4	4	4	2	2	4	4	6	0.75
3	Mass screening and diagnosis should be carried out alongside mass drug administration with praziquantel.	4	4	4	4	3	3	4	4	8	1
4	Schistosomiasis surveillance enables programme managers to monitor the effectiveness of intervention strategies and identify which populations require continuing interventions.	4	4	4	4	3	3	4	4	8	1
5	The availability of Rapid Diagnostic Test (RDTs), which requires only minimal infrastructure, would improve diagnosis and surveillance simultaneously.	4	4	4	4	3	3	4	4	8	1
6	Implementing an affordable and simple point-of-care (POC) diagnostics solution will reduce the financial burden of equipment and personnel at each health facility.	4	4	3	3	3	3	4	4	8	1
7	Point-of-care diagnostics that can detect and confirm cases immediately will reduce the risk of missed or misdiagnosed cases.	4	4	3	3	2	3	4	3	7	0.875
8	The quantification of egg excretion helps to assess the transmission potential of populations living in endemic areas.	4	4	4	4	3	3	4	4	8	1
9	Schistosomiasis control programs should target school-aged children only.	4	4	4	4	3	3	4	3	8	1
10	Due to the low level of education and lack of training among community health workers, incorrect treatment is often prescribed.	4	4	4	4	3	3	4	4	8	1
11	Presenting data on the severity of schistosomiasis infection of specific locations will guide the development of strategies for effective case management and control elimination.	4	4	4	4	3	3	4	4	8	1
12	Passive case detection, based on people’s self-reporting, has been considered a less expensive strategy for the control of schistosomiasis.	4	4	4	4	3	3	4	4	8	1
13	Prevalence and intensity of infection is often higher among children than among adults.	4	4	4	4	3	3	4	4	8	1
14	Schistosomiasis diagnosis should be done closest to the community as it reduces the time to carry samples back to the laboratory.	4	4	4	4	3	3	4	4	8	1
15	Diagnostic and treatment campaigns should target school-age children, adolescents and those whose occupations involve contact with infectious water (e.g fishing, farming, irrigation, and domestic tasks in water).	4	4	4	4	3	3	4	4	8	1
16	Simple, rapid point-of-care (POC) tests should be used in primary health care settings where patients often travel long distances to access healthcare facilities.	3	4	4	4	3	3	4	4	8	1
17	Diagnostic devices should be deployed in primary health care centres, clinics and health posts since they are the most lacking in equipment.	4	4	4	4	3	3	4	4	8	1
18	Testing of urine samples for schistosomiasis with school-based surveys should be done at the school location.	4	4	4	4	3	3	4	4	8	1
19	It is convenient to treat patients for schistosomiasis infection without a confirmed diagnosis due to the delay in receiving test results from referral hospitals.	4	4	3	3	3	3	4	4	8	1
20	Schistosomiasis elimination calls for developing novel diagnostic tools with higher sensitivity and specificity than microscopes.	4	4	4	4	2	3	4	4	7	0.875
21	Diagnostic device for schistosomiasis with minimal to no sample preparation is ideal.	4	4	4	4	2	3	4	4	7	0.875
22	The diagnostic device should quantify eggs to provide an estimation of the number of people that have been exposed to schistosomiasis in a population.	4	4	4	4	3	3	4	4	8	1
23	Devices should be easy to use by medical personnel and health workers such as Community Health Extension Workers (CHEWS), Community Health Officers (CHO), Laboratory scientists to detect and diagnose schistosomiasis infected patients.	4	4	4	4	3	3	4	4	8	1
24	Patient samples should be processed in batches to get a faster turnaround time and increase the efficiency of sample processing during mass campaigns or sensitization meetings.	4	4	4	4	3	3	4	4	8	1
25	Ideal diagnostic approaches should allow the concurrent detection of several pathogens in different biological samples such as urine, blood and stool.	4	4	4	4	3	3	4	4	8	1
26	Diagnostic devices should be sensitive enough for detecting very light schistosomiasis infections.	4	4	3	3	2	3	4	4	7	0.875
27	Diagnostic devices should have their own reliable power sources due to the unstable power connectivity in rural and distant communities.	4	4	3	3	2	3	4	4	7	0.875
28	The best diagnostic devices should be easy to transport safely in cars, on motorbikes, and bicycles to remote locations.	4	4	4	4	2	3	4	4	7	0.875
29	Diagnostic devices should be compact and portable so that it can be easily deployed in the community.	4	4	4	4	3	3	4	4	8	1
30	Diagnostic devices/tests should identify and map out areas with a large spread of schistosomiasis and be able to trace the source of the disease.	4	4	4	4	3	3	4	4	8	1
31	Devices should be locally repaired and maintained by local technicians in case of breakdown.	4	4	4	4	3	3	4	4	8	1
32	The device should be easy to clean and disinfect to prevent re-contamination.	4	4	4	4	3	3	4	4	8	1
33	The cost per diagnostic test should be free (covered by the Government).	4	4	4	4	3	3	4	4	8	1
34	Cost per diagnostic test should be less than 1000 Naira (€2).	4	4	4	4	3	3	4	4	8	1
35	Mass drug administration campaigns should be accompanied by mass diagnostic and disease awareness campaigns.	4	4	4	4	3	3	4	4	8	1
36	Data from diagnostic devices should be accessible to stakeholders (local government, DSNO, MOH, Researchers and NGOs) to enhance planning.	4	4	3	3	3	3	4	4	8	1
37	New interventions should consider training the health care workers at the community level and the informal sector (PMVs and traditional medicine) to increase coverage to diagnostics.	4	4	4	4	3	3	4	4	8	1
38	Diagnostic tools for schistosomiasis should be deployed and used at the community level by PMVs and community mobilizers as they already serve as trusted stakeholders in the community.	4	4	4	4	3	3	4	4	8	1
39	The role of the village/community head is important in the acceptance of the new diagnostic device.	4	4	4	4	3	3	4	4	8	1
40	Patients with schistosomiasis should be tested before being treated.	4	4	4	4	3	3	4	3	8	1

## Sheet: ICVI  Final ascending order
Item Description	Statement	Rater 1	Rater 2	Rater 3	Rater 4	Rater 5	Rater 6	Rater 7	Rater 8	Number of Agree	I-CVI
Item 2	Diagnosis should include the identification of Schistosoma parasites in both humans and water sources that may be contaminated.	4	4	4	4	2	2	4	4	6	0.75
Item 1	Microscopy using a concentration technique is the recommended method to prove active schistosomiasis, despite its low sensitivity and need for expert users.	4	4	4	4	2	3	3	3	7	0.875
Item 7	Point-of-care diagnostics that can detect and confirm cases immediately will reduce the risk of missed or misdiagnosed cases.	4	4	3	3	2	3	4	3	7	0.875
Item 20	Schistosomiasis elimination calls for developing novel diagnostic tools with higher sensitivity and specificity than microscopes.	4	4	4	4	2	3	4	4	7	0.875
Item 21	Diagnostic device for schistosomiasis with minimal to no sample preparation is ideal.	4	4	4	4	2	3	4	4	7	0.875
Item 26	Diagnostic devices should be sensitive enough for detecting very light schistosomiasis infections.	4	4	3	3	2	3	4	4	7	0.875
Item 27	Diagnostic devices should have their own reliable power sources due to the unstable power connectivity in rural and distant communities.	4	4	3	3	2	3	4	4	7	0.875
Item 28	The best diagnostic devices should be easy to transport safely in cars, on motorbikes, and bicycles to remote locations.	4	4	4	4	2	3	4	4	7	0.875
Item 3	Mass screening and diagnosis should be carried out alongside mass drug administration with praziquantel.	4	4	4	4	3	3	4	4	8	1
Item 4	Schistosomiasis surveillance enables programme managers to monitor the effectiveness of intervention strategies and identify which populations require continuing interventions.	4	4	4	4	3	3	4	4	8	1
Item 5	The availability of Rapid Diagnostic Test (RDTs), which requires only minimal infrastructure, would improve diagnosis and surveillance simultaneously.	4	4	4	4	3	3	4	4	8	1
Item 6	Implementing an affordable and simple point-of-care (POC) diagnostics solution will reduce the financial burden of equipment and personnel at each health facility.	4	4	3	3	3	3	4	4	8	1
Item 8	The quantification of egg excretion helps to assess the transmission potential of populations living in endemic areas.	4	4	4	4	3	3	4	4	8	1
Item 9	Schistosomiasis control programs should target school-aged children only.	4	4	4	4	3	3	4	3	8	1
Item 10	Due to the low level of education and lack of training among community health workers, incorrect treatment is often prescribed.	4	4	4	4	3	3	4	4	8	1
Item 11	Presenting data on the severity of schistosomiasis infection of specific locations will guide the development of strategies for effective case management and control elimination.	4	4	4	4	3	3	4	4	8	1
Item 12	Passive case detection, based on people’s self-reporting, has been considered a less expensive strategy for the control of schistosomiasis.	4	4	4	4	3	3	4	4	8	1
Item 13	Prevalence and intensity of infection is often higher among children than among adults.	4	4	4	4	3	3	4	4	8	1
Item 14	Schistosomiasis diagnosis should be done closest to the community as it reduces the time to carry samples back to the laboratory.	4	4	4	4	3	3	4	4	8	1
Item 15	Diagnostic and treatment campaigns should target school-age children, adolescents and those whose occupations involve contact with infectious water (e.g fishing, farming, irrigation, and domestic tasks in water).	4	4	4	4	3	3	4	4	8	1
Item 16	Simple, rapid point-of-care (POC) tests should be used in primary health care settings where patients often travel long distances to access healthcare facilities.	3	4	4	4	3	3	4	4	8	1
Item 17	Diagnostic devices should be deployed in primary health care centres, clinics and health posts since they are the most lacking in equipment.	4	4	4	4	3	3	4	4	8	1
Item 18	Testing of urine samples for schistosomiasis with school-based surveys should be done at the school location.	4	4	4	4	3	3	4	4	8	1
Item 19	It is convenient to treat patients for schistosomiasis infection without a confirmed diagnosis due to the delay in receiving test results from referral hospitals.	4	4	3	3	3	3	4	4	8	1
Item 22	The diagnostic device should quantify eggs to provide an estimation of the number of people that have been exposed to schistosomiasis in a population.	4	4	4	4	3	3	4	4	8	1
Item 23	Devices should be easy to use by medical personnel and health workers such as Community Health Extension Workers (CHEWS), Community Health Officers (CHO), Laboratory scientists to detect and diagnose schistosomiasis infected patients.	4	4	4	4	3	3	4	4	8	1
Item 24	Patient samples should be processed in batches to get a faster turnaround time and increase the efficiency of sample processing during mass campaigns or sensitization meetings.	4	4	4	4	3	3	4	4	8	1
Item 25	Ideal diagnostic approaches should allow the concurrent detection of several pathogens in different biological samples such as urine, blood and stool.	4	4	4	4	3	3	4	4	8	1
Item 29	Diagnostic devices should be compact and portable so that it can be easily deployed in the community.	4	4	4	4	3	3	4	4	8	1
Item 30	Diagnostic devices/tests should identify and map out areas with a large spread of schistosomiasis and be able to trace the source of the disease.	4	4	4	4	3	3	4	4	8	1
Item 31	Devices should be locally repaired and maintained by local technicians in case of breakdown.	4	4	4	4	3	3	4	4	8	1
Item 32	The device should be easy to clean and disinfect to prevent re-contamination.	4	4	4	4	3	3	4	4	8	1
Item 33	The cost per diagnostic test should be free (covered by the Government).	4	4	4	4	3	3	4	4	8	1
Item 34	Cost per diagnostic test should be less than 1000 Naira (€2).	4	4	4	4	3	3	4	4	8	1
Item 35	Mass drug administration campaigns should be accompanied by mass diagnostic and disease awareness campaigns.	4	4	4	4	3	3	4	4	8	1
Item 36	Data from diagnostic devices should be accessible to stakeholders (local government, DSNO, MOH, Researchers and NGOs) to enhance planning.	4	4	3	3	3	3	4	4	8	1
Item 37	New interventions should consider training the health care workers at the community level and the informal sector (PMVs and traditional medicine) to increase coverage to diagnostics.	4	4	4	4	3	3	4	4	8	1
Item 38	Diagnostic tools for schistosomiasis should be deployed and used at the community level by PMVs and community mobilizers as they already serve as trusted stakeholders in the community.	4	4	4	4	3	3	4	4	8	1
Item 39	The role of the village/community head is important in the acceptance of the new diagnostic device.	4	4	4	4	3	3	4	4	8	1
Item 40	Patients with schistosomiasis should be tested before being treated.	4	4	4	4	3	3	4	3	8	1

## Sheet: SPSS data entry
S1	S2	S3	S4	S5	S6	S7	S8	S9	S10	S11	S12	S13	S14	S15	S16	S17	S18	S19	S20	S21	S22	S23	S24	S25	S26	S27	S28	S29	S30	S31	S32	S33	S34	S35	S36	S37	S38	S39	S40
4	4	4	4	4	4	4	4	4	4	4	4	4	4	4	3	4	4	4	4	4	4	4	4	4	4	4	4	4	4	4	4	4	4	4	4	4	4	4	4
4	4	4	4	4	4	4	4	4	4	4	4	4	4	4	4	4	4	4	4	4	4	4	4	4	4	4	4	4	4	4	4	4	4	4	4	4	4	4	4
4	4	4	4	4	3	3	4	4	4	4	4	4	4	4	4	4	4	3	4	4	4	4	4	4	3	3	4	4	4	4	4	4	4	4	3	4	4	4	4
4	4	4	4	4	3	3	4	4	4	4	4	4	4	4	4	4	4	3	4	4	4	4	4	4	3	3	4	4	4	4	4	4	4	4	3	4	4	4	4
2	2	3	3	3	3	2	3	3	3	3	3	3	3	3	3	3	3	3	2	2	3	3	3	3	2	2	2	3	3	3	3	3	3	3	3	3	3	3	3
3	2	3	3	3	3	3	3	3	3	3	3	3	3	3	3	3	3	3	3	3	3	3	3	3	3	3	3	3	3	3	3	3	3	3	3	3	3	3	3
3	4	4	4	4	4	4	4	4	4	4	4	4	4	4	4	4	4	4	4	4	4	4	4	4	4	4	4	4	4	4	4	4	4	4	4	4	4	4	4
3	4	4	4	4	4	4	4	3	3	4	4	4	4	4	4	4	4	4	4	4	4	4	4	4	4	4	4	4	4	4	4	4	4	4	4	4	4	4	3
